# Supplementary material
Source: PubMed Central journal article supplement (PMC3361396)
Supplement: 1202464109_pnas.201202464SI.pdf [file 1202464109_pnas.201202464SI.pdf]

# Supporting Information

Iwaisako et al. 10.1073/pnas.1202464109

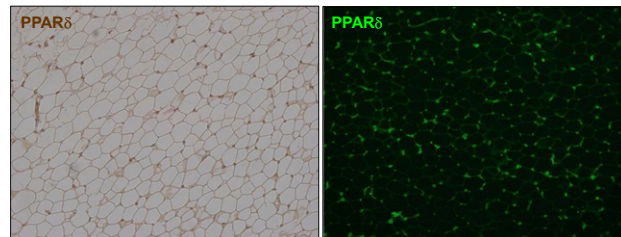

**Fig. S1.** Adipocytes express peroxisome proliferator-activated receptor delta (PPAR $\delta$ ). Immunohistochemical (Left) and immunofluorescent (Right) staining for PPAR $\delta$  in adipose tissue.

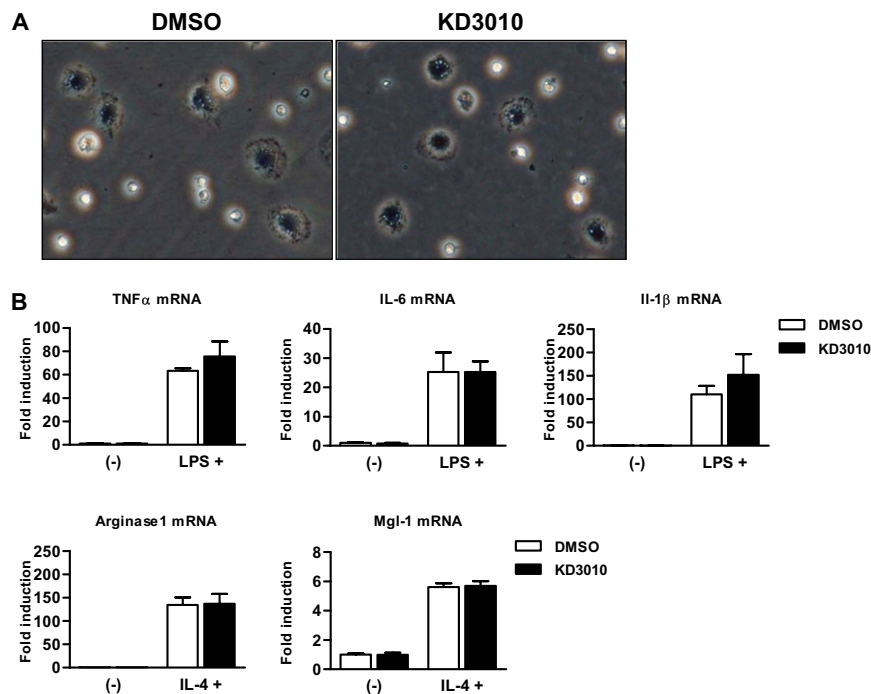

**Fig. S2.** Effect of KD3010 on Kupffer cells. (A) The morphology of cultured Kupffer cells treated with KD3010 for 1 d did not change compared with DMSO-incubated cells. (B) LPS-stimulated expression of M1 markers (*TNF $\alpha$* , *IL-6*, and *IL-1 $\beta$* ) and IL-4-induced expression of M2 markers, arginase1 and macrophage galactose-type C-type lectin 1 (*Mgl-1*) in Kupffer cells cultured with KD3010 was analyzed by quantitative PCR and normalized to 18S.



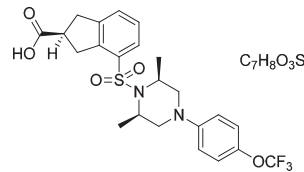

Fig. S5. Structure of KD3010.

Table S1. Up-regulated genes in cultured hepatocytes incubated with GW501516

|    | Gene symbol          | Control (DMSO) signal | GW501516 signal | Fold change | Gene annotation                                                                                              |
|----|----------------------|-----------------------|-----------------|-------------|--------------------------------------------------------------------------------------------------------------|
| 1  | <i>Pdk4</i>          | 631                   | 3110            | 4.93        | Pyruvate dehydrogenase kinase, isoenzyme 4 (Pdk4), mRNA                                                      |
| 2  | <i>Adfp</i>          | 1721                  | 5410            | 3.14        | Adipose differentiation related protein (Adfp), mRNA                                                         |
| 3  | <i>Creb3l3</i>       | 706                   | 2129            | 3.02        | cAMP responsive element binding protein 3-like 3 (Creb3l3), mRNA                                             |
| 4  | <i>2310016C08Rik</i> | 2264                  | 5712            | 2.52        | RIKEN cDNA 2310016C08 gene (2310016C08Rik), mRNA                                                             |
| 5  | <i>Hmgcs2</i>        | 1685                  | 3529            | 2.09        | 3-Hydroxy-3-methylglutaryl-Coenzyme A synthase 2 (Hmgcs2), nuclear gene encoding mitochondrial protein, mRNA |
| 6  | <i>Aadacl1</i>       | 1008                  | 2080            | 2.06        | Arylacetamide deacetylase-like 1 (Aadacl1), mRNA                                                             |
| 7  | <i>Ehhadh</i>        | 393                   | 669             | 1.70        | Enoyl-Coenzyme A, hydratase/3-hydroxyacyl Coenzyme A dehydrogenase (Ehhadh), mRNA                            |
| 8  | <i>Cpt2</i>          | 1399                  | 2290            | 1.64        | Carnitine palmitoyltransferase 2 (Cpt2), mRNA                                                                |
| 9  | <i>Acaa1b</i>        | 4060                  | 6543            | 1.61        | Acetyl-Coenzyme A acyltransferase 1B (Acaa1b), mRNA                                                          |
| 11 | <i>E130016E03Rik</i> | 454                   | 713             | 1.57        | RIKEN cDNA E130016E03 gene (E130016E03Rik), mRNA                                                             |
| 12 | <i>Ctgf</i>          | 12460                 | 18879           | 1.52        | Connective tissue growth factor (Ctgf), mRNA                                                                 |
| 13 | <i>Gm2a</i>          | 1594                  | 2412            | 1.51        | GM2 ganglioside activator protein (Gm2a), mRNA                                                               |

Comparative DNA microarray data of hepatocytes cultured with DMSO or GW501516 (100nM), showing the top 13 genes whose expression were up-regulated in hepatocytes cultured with GW501516 compared with control.

Table S2. Up-regulated genes in cultured hepatocytes incubated with KD3010

|    | Gene symbol          | Control (DMSO) signal | KD3010 signal | Fold change | Gene annotation                                                  |
|----|----------------------|-----------------------|---------------|-------------|------------------------------------------------------------------|
| 1  | <i>Adfp</i>          | 1721                  | 6577          | 3.82        | Adipose differentiation related protein (Adfp), mRNA             |
| 2  | <i>Creb3l3</i>       | 706                   | 2215          | 3.14        | cAMP responsive element binding protein 3-like 3 (Creb3l3), mRNA |
| 3  | <i>2310016C08Rik</i> | 2264                  | 6431          | 2.84        | RIKEN cDNA 2310016C08 gene (2310016C08Rik), mRNA                 |
| 4  | <i>Pdk4</i>          | 631                   | 1732          | 2.74        | Pyruvate dehydrogenase kinase, isoenzyme 4 (Pdk4), mRNA          |
| 5  | <i>E130016E03Rik</i> | 454                   | 934           | 2.06        | RIKEN cDNA E130016E03 gene (E130016E03Rik), mRNA                 |
| 6  | <i>Aadacl1</i>       | 1008                  | 1925          | 1.91        | Arylacetamide deacetylase-like 1 (Aadacl1), mRNA                 |
| 7  | <i>Adora2b</i>       | 1136                  | 2026          | 1.78        | Adenosine A2b receptor (Adora2b), mRNA                           |
| 8  | <i>4632417N05Rik</i> | 1212                  | 2026          | 1.67        | RIKEN cDNA 4632417N05 gene (4632417N05Rik), mRNA                 |
| 9  | <i>Cpt2</i>          | 1399                  | 2270          | 1.62        | Carnitine palmitoyltransferase 2 (Cpt2), mRNA                    |
| 10 | <i>Hist1h1c</i>      | 2231                  | 3540          | 1.59        | Histone cluster 1, H1c (Hist1h1c), mRNA                          |
| 11 | <i>Nol5a</i>         | 1803                  | 2827          | 1.57        | Nucleolar protein 5A (Nol5a), mRNA                               |
| 12 | <i>Fcgrt</i>         | 1245                  | 1946          | 1.56        | Fc receptor, IgG, alpha chain transporter (Fcgrt), mRNA          |
| 13 | <i>Vim</i>           | 975                   | 1523          | 1.56        | Vimentin (Vim), mRNA                                             |

Comparative DNA microarray data of hepatocytes cultured with DMSO or KD3010 (5µM), showing the top 13 genes whose expression were up-regulated in hepatocytes cultured with KD3010 compared with control.
